# Supplementary figures and images for: Conditional and biased regeneration of cone photoreceptor types in the zebrafish retina
Source: PubMed Central journal article supplement — J Comp Neurol. Author manuscript; Available in PMC 2021 Dec 1. (PMC8496684; doi:10.1002/cne.24933), 2020-06-18

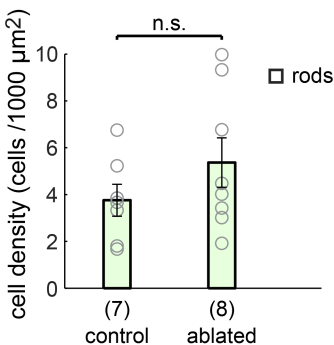

Supplement: NIHMS1738171-supplement-supporting_information.pdf [file NIHMS1738171-supplement-supporting_information.pdf]
